# Supplementary material for: Quantitative mapping of proteasome interactomes and substrates using ProteasomeID
Source: eLife journal article supplement (doi:10.7554/elife.93256), 2024-01-30

**Figure 1b**

amidoblack

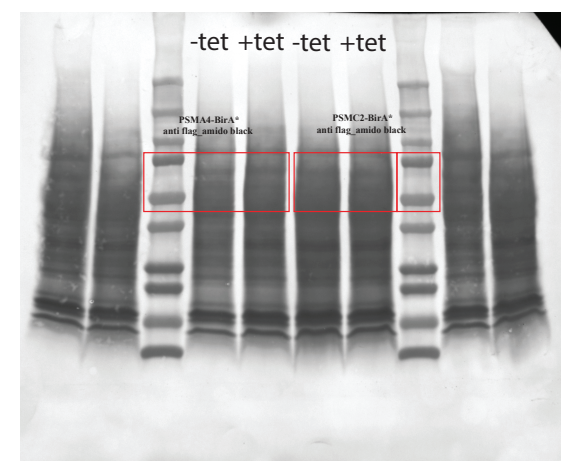

anti-Flag

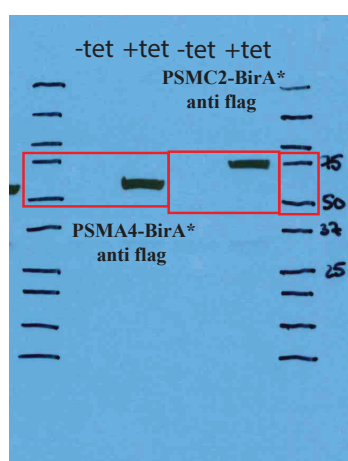

ponceau S

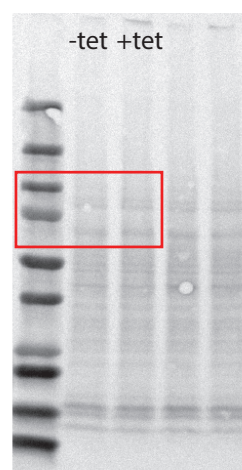

anti-Flag  
PSMD3

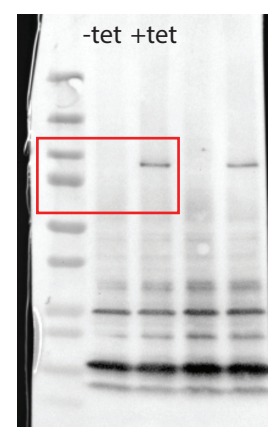

amidoblack

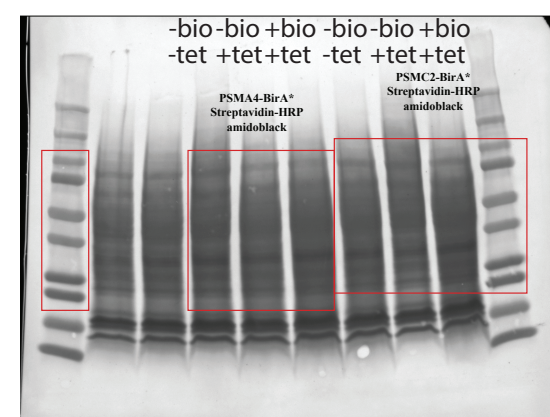

streptavidin-HRP

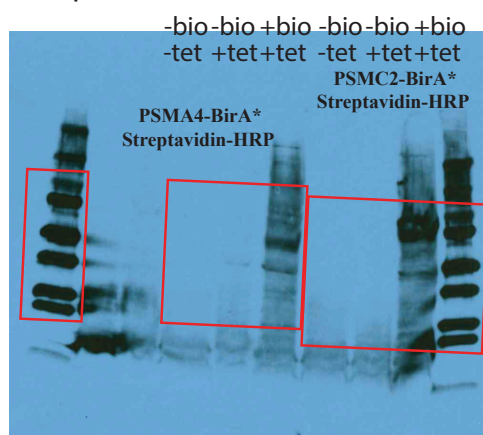

ponceau S

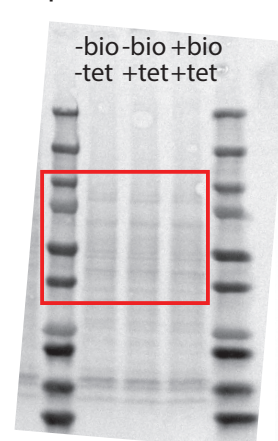

streptavidin-  
HRP

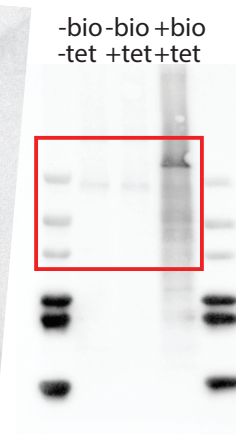

Supplement: fig1-data2 [file Figure_1b_highlighted.pdf › Figure1_SourceData_2/Figure_1b_highlighted.pdf]
