# Supplementary material for: Quantitative mapping of proteasome interactomes and substrates using ProteasomeID
Source: eLife journal article supplement (doi:10.7554/elife.93256), 2024-01-30
Supplement: fig2-data2 [file Figure_2c.pdf › Figure2_SourceData_2/Figure_2c.pdf]

**Figure 2c**

anti-PSMA4

anti-Flag

anti-PSMC2

| PSMA4-BirA* |      | BirA*-Ctr |      | PSMA4-BirA* |      | BirA*-Ctr |      | PSMA4-BirA* |      | BirA*-Ctr |      |
|-------------|------|-----------|------|-------------|------|-----------|------|-------------|------|-----------|------|
| -tet        | +tet | -tet      | +tet | -tet        | +tet | -tet      | +tet | -tet        | +tet | -tet      | +tet |

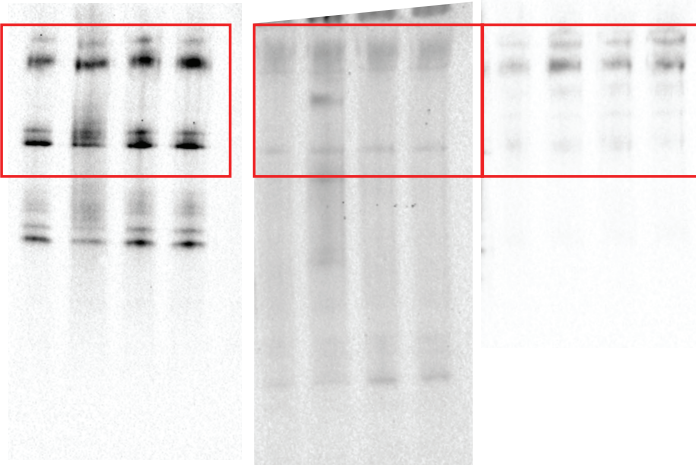

30S  
26S  
20S
