# Supplementary material for: Quantitative mapping of proteasome interactomes and substrates using ProteasomeID
Source: eLife journal article supplement (doi:10.7554/elife.93256), 2024-01-30
Supplement: fig6-figsupp1-data2 [file Figure6_S1a_.pdf › Figure6-figure_supplement1_SourceData_2/Figure6_S1a_.pdf]

ponceau S

**Figure 1a**

| MW<br>(kDa) | 10 days<br>Dox | 31 days<br>Dox | No<br>Dox |
|-------------|----------------|----------------|-----------|
| 72          |                |                |           |
| 66          |                |                |           |
| 60          |                |                |           |
| 54          |                |                |           |
| 48          |                |                |           |
| 42          |                |                |           |
| 36          |                |                |           |
| 30          |                |                |           |
| 24          |                |                |           |
| 18          |                |                |           |
| 12          |                |                |           |
| 6           |                |                |           |

\*  
▼

Western blot analysis of p150CrkL expression. The blot shows a single band for p150CrkL across all lanes, with a molecular weight marker on the right. The lanes are labeled: 10 days Dox, 31 days Dox, and No Dox. The band intensity is consistent across all lanes, indicating no change in p150CrkL expression over time or with Dox treatment.

Western blot analysis of p115RhoGEF expression in MCF-7 cells. The blot shows protein bands at approximately 115 kDa. Lanes are labeled: MW (kDa), 10 days Dox, 31 days Dox, and No Dox. Molecular weight markers are on the left. An asterisk (\*) and a downward arrow (▼) are on the right side of the blot.

Western blot analysis of p53 protein levels. The blot shows a single band for p53 protein, with an asterisk (\*) indicating a non-specific band in the 31 days Dox group. A black triangle points to the p53 band.

| 10 days<br>Dox | 31 days<br>Dox | No<br>Dox |
|----------------|----------------|-----------|
|                |                |           |

Western blot analysis of p53 protein levels. The blot shows p53 protein bands across three groups: 10 days Dox, 31 days Dox, and No Dox. Molecular weight markers (MW) are indicated on the left in kDa. The 31 days Dox group shows a prominent band at approximately 53 kDa, indicating p53 activation.

Western blot analysis of p53 phosphorylation. The blot shows p53 protein levels across 12 lanes. Lanes 1-4 are 10 days Dox, lanes 5-8 are 31 days Dox, and lanes 9-12 are No Dox. A molecular weight marker (MW) is shown on the left. Phosphorylated p53 bands are visible in the 10 days Dox and 31 days Dox lanes, but absent in the No Dox lanes.
