# Supplementary figures and images for: Quantitative mapping of proteasome interactomes and substrates using ProteasomeID
Source: eLife journal article supplement (doi:10.7554/elife.93256), 2024-01-30

Figure 2a

ponceau S

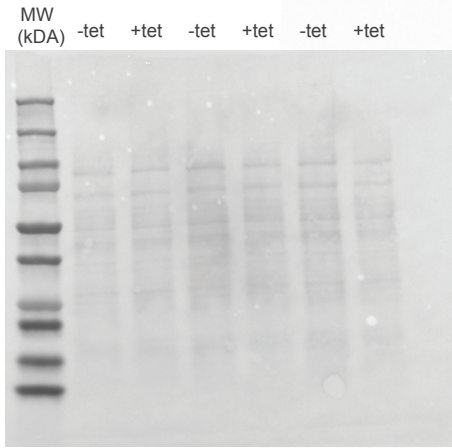

anti-PSMA4

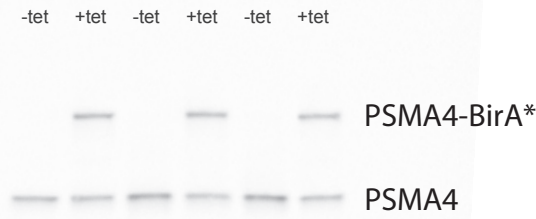

Supplement: fig2-data2 [file Figure_2a.pdf › Figure2_SourceData_2/Figure_2a.pdf]

Figure 2f

ponceau S

anti-c-myc

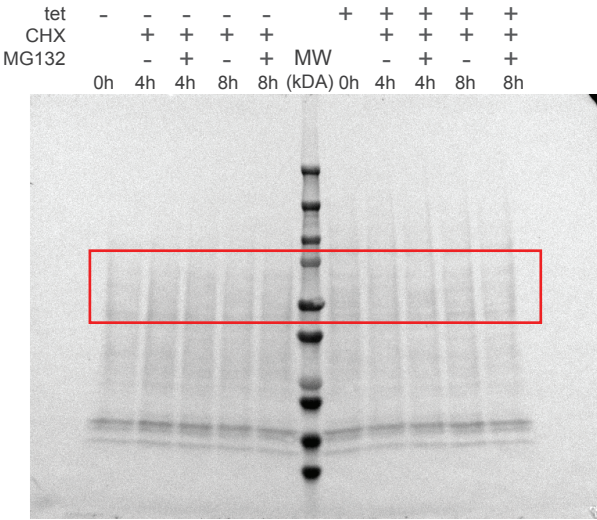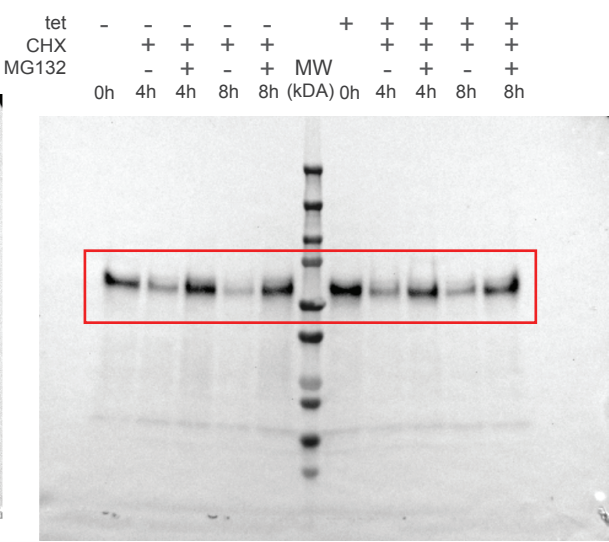

Supplement: fig2-data2 [file Figure_2f.pdf › Figure2_SourceData_2/Figure_2f.pdf]

Figure 2 figure supplement 1d

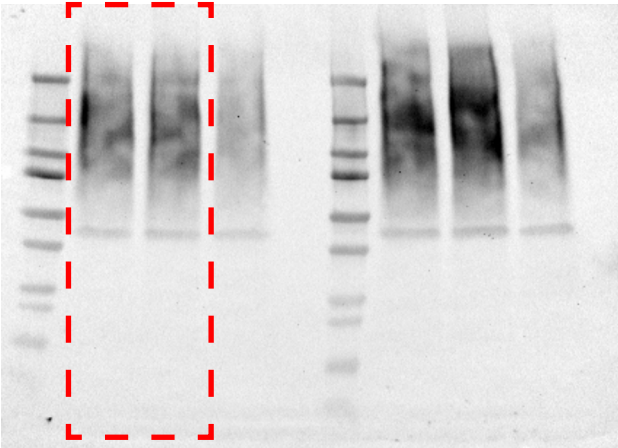

K48-Ubi

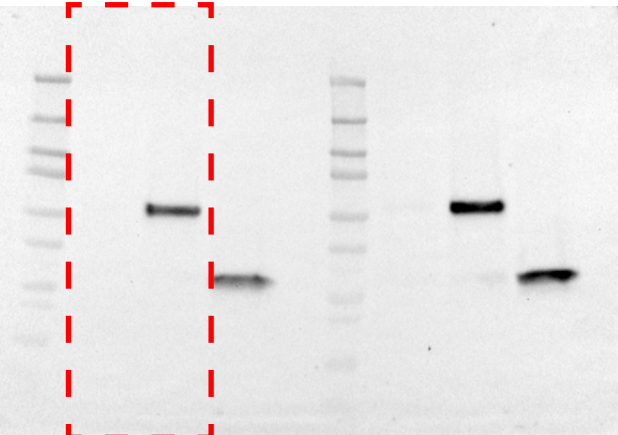

anti-BirA

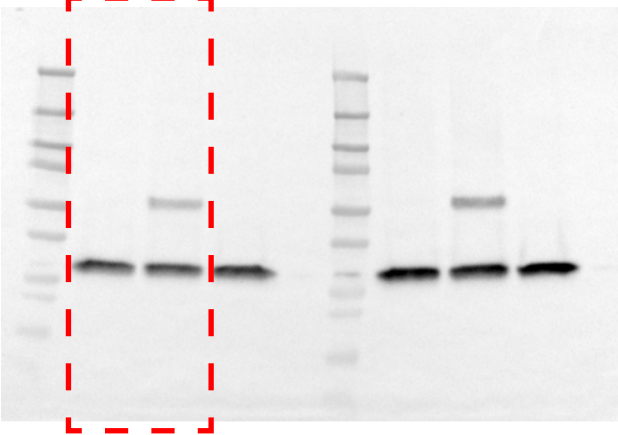

anti-PSMA4

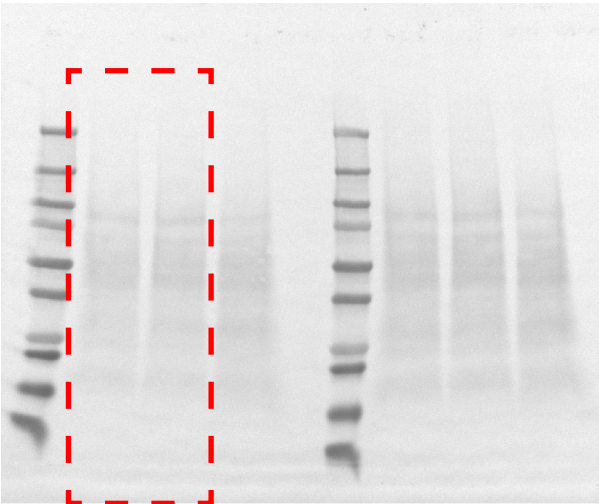

PonceauS

Supplement: fig2-figsupp1-data2 [file Figure2_figure_supplement1d_uncropped_gels.pdf › Figure2_figure_supplement1_SourceData_2/Figure2_figure_supplement1d_uncropped_gels.pdf]

Figure 4 figure supplement 1a

anti-GAPDH

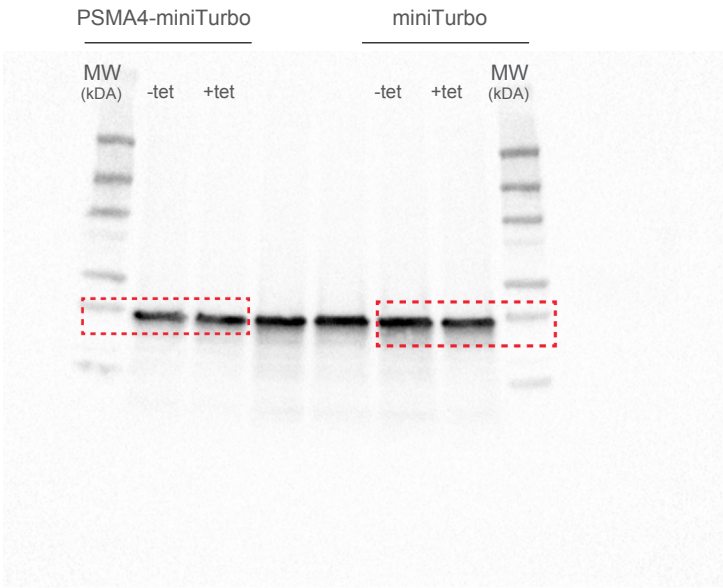

anti-Flag

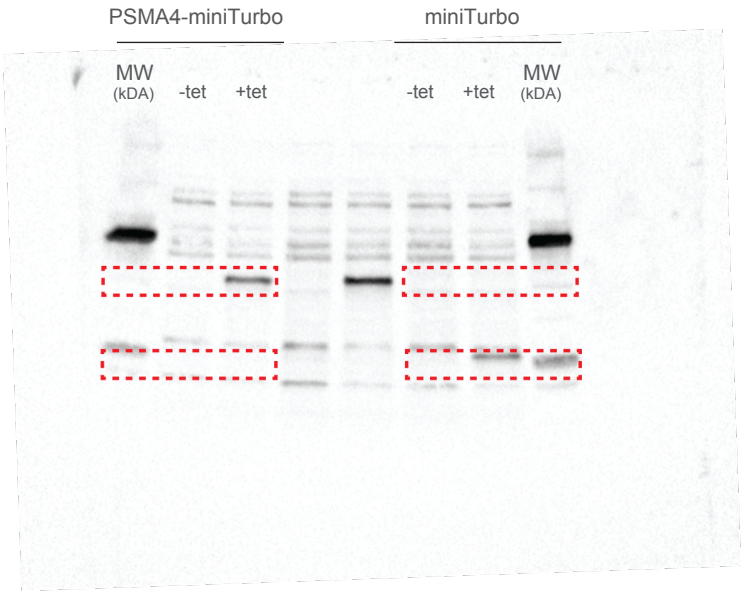

Supplement: fig4-figsupp1-data2 [file Figure4_S1a.pdf › Figure4_SourceData_2/Figure4_S1a.pdf]

Figure 4 figure supplement 1b

anti-GAPDH

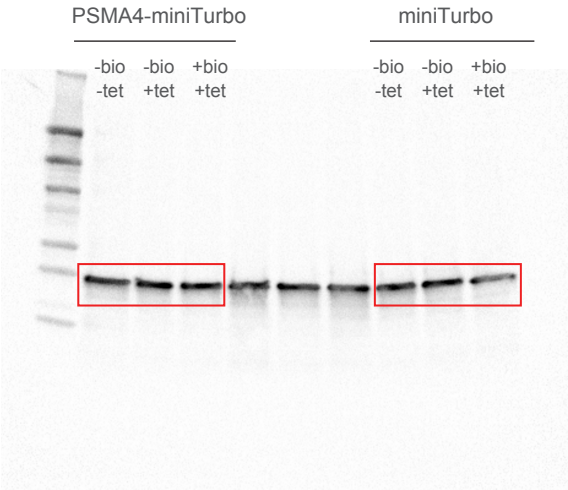

streptavidin-HRP

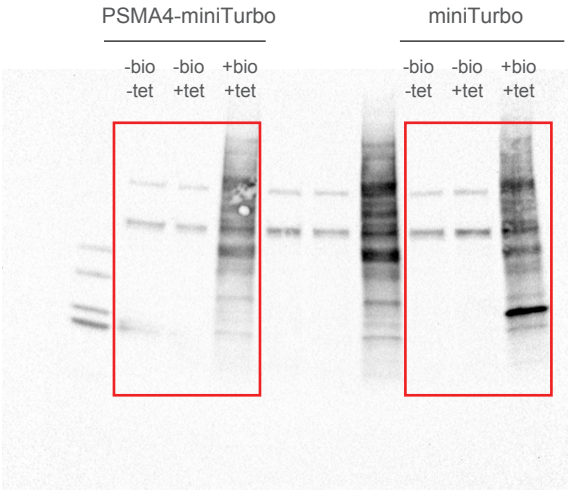

Supplement: fig4-figsupp1-data2 [file Figure4_S1b.pdf › Figure4_SourceData_2/Figure4_S1b.pdf]

Figure 4 figure supplement 1c

ponceau S

streptavidin-HRP

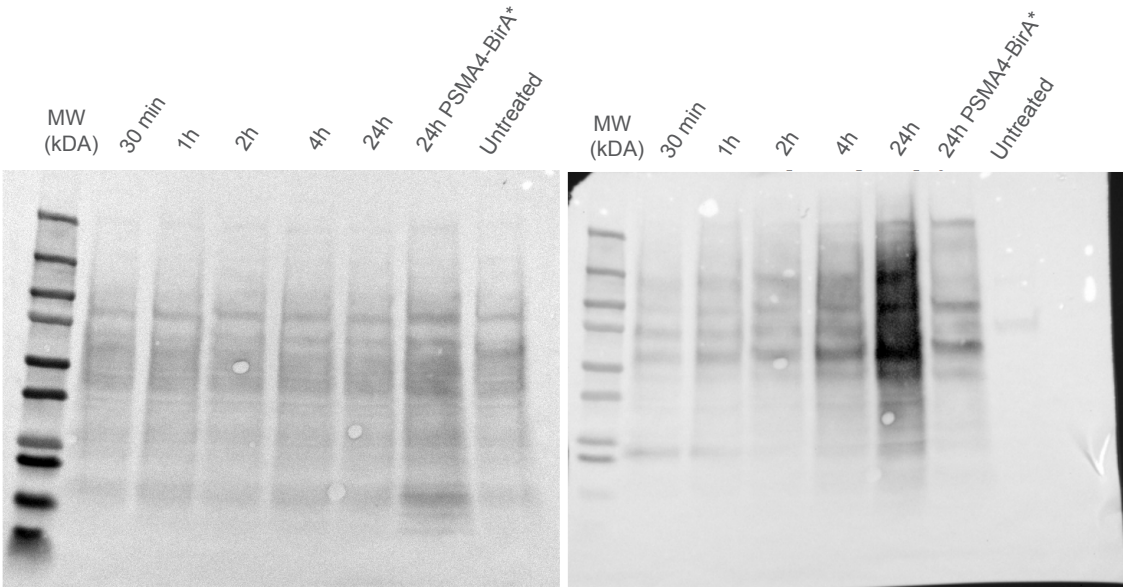

Supplement: fig4-figsupp1-data2 [file Figure4_S1c.pdf › Figure4_SourceData_2/Figure4_S1c.pdf]

Figure 4 figure supplement 1f

ponceau S

anti-Ubi-K48

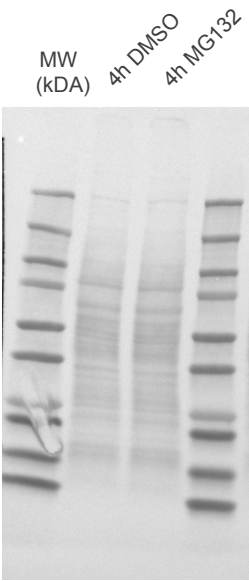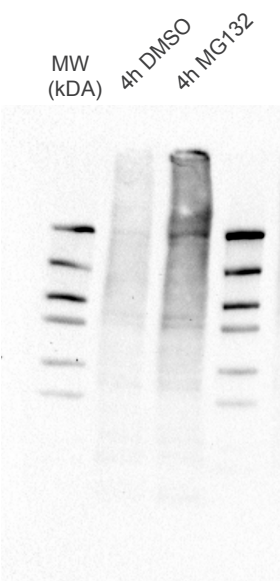

Supplement: fig4-figsupp1-data2 [file Figure4_S1f.pdf › Figure4_SourceData_2/Figure4_S1f.pdf]

**Figure S4j**

anti-MYC

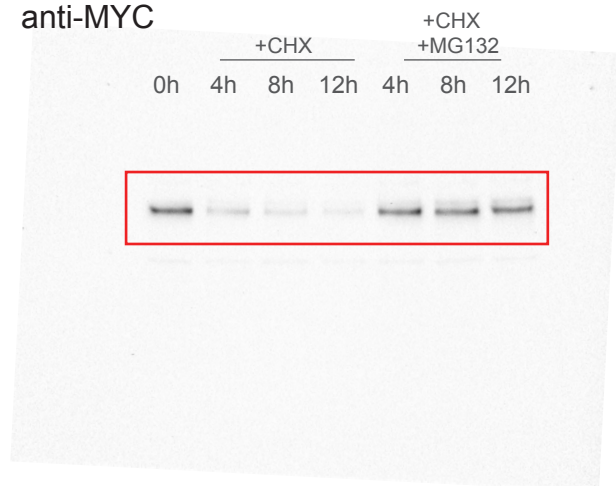

anti-ARMC6

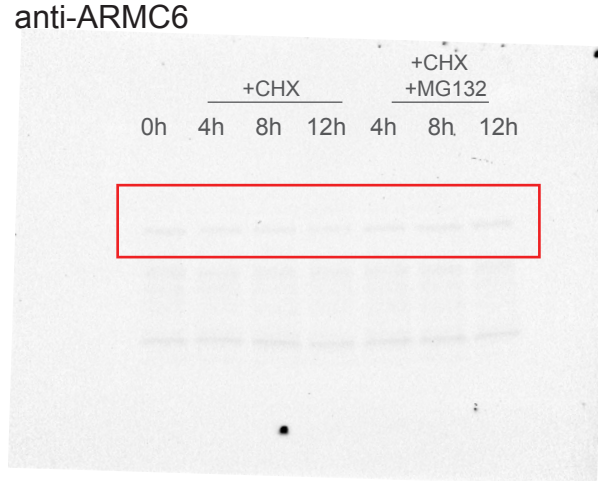

anti-BRAT1

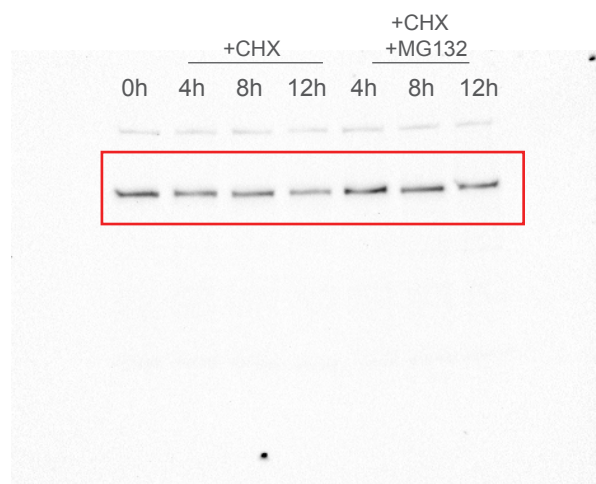

anti-GAPDH

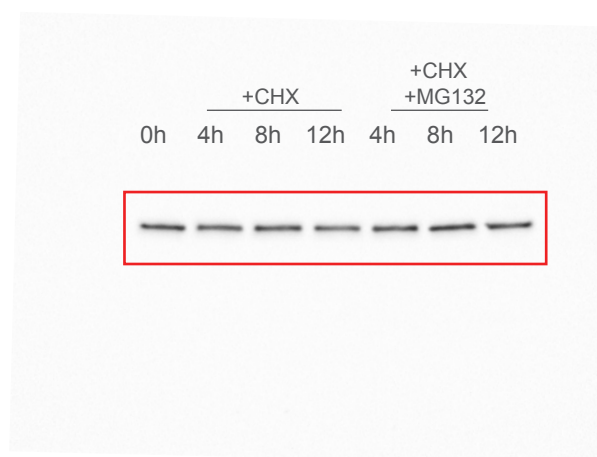

anti-GAPDH (for TIGD5 blot)

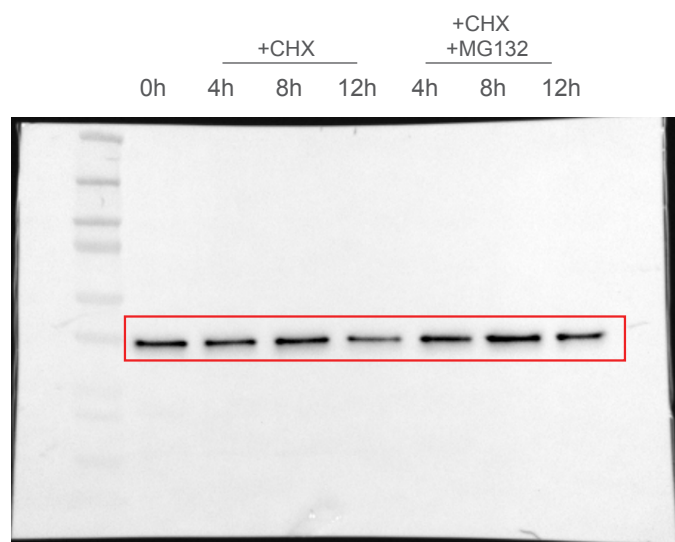

anti-TIGD5

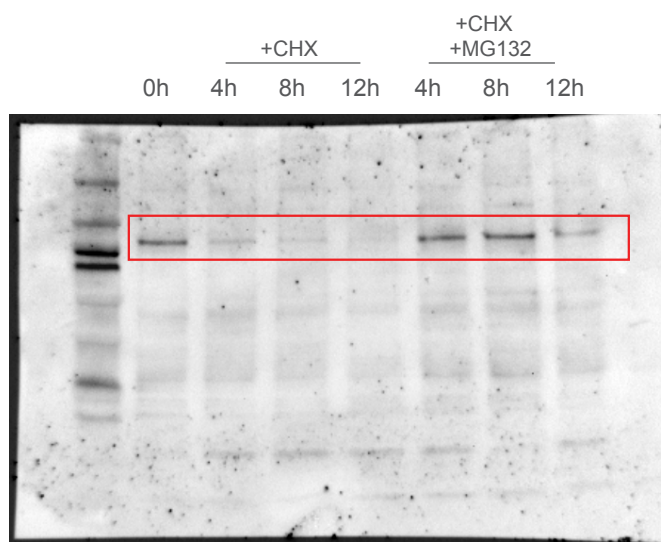

Supplement: fig4-figsupp1-data2 [file Figure4_S1j.pdf › Figure4_SourceData_2/Figure4_S1j.pdf]

**Figure 6e**

anti-GFP

anti-PSMA4

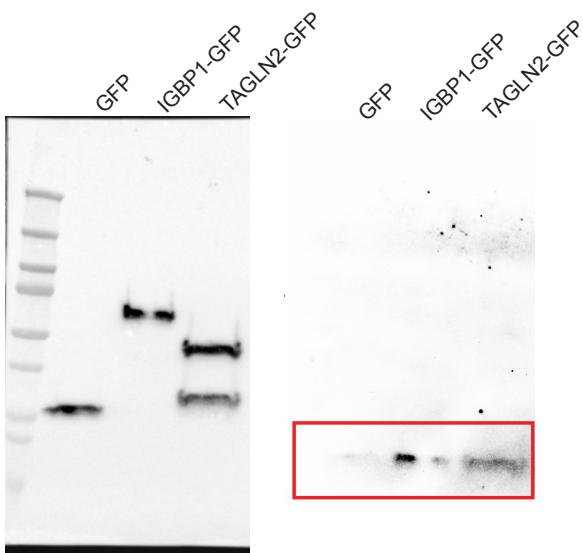

Supplement: fig6-data2 [file Figure_6e.pdf › Figure6_SourceData_2/Figure_6e.pdf]
